# Supplementary material for: Tyrosine 51 residue of the syndecan-2 extracellular domain is involved in the interaction with and activation of pro-matrix metalloproteinase-7
Source: PubMed Central journal article supplement (PMC6650482; doi:10.1038/s41598-019-47140-5), 2019-07-23
Supplement: 41598_2019_47140_MOESM1_ESM.pdf [file 41598_2019_47140_MOESM1_ESM.pdf]

**Tyrosine 51 residue of the syndecan-2 extracellular domain is involved in the interaction with and activation of pro-matrix metalloproteinase-7**

**Bohee Jang<sup>1\*</sup>, Ji-Hye Yun<sup>2\*</sup>, Sojoong Choi<sup>1</sup>, Jimin Park<sup>3</sup>, Dong Hae Shin<sup>3</sup>, Seung-Taek Lee<sup>2</sup>, Weontae Lee<sup>2@</sup>, Eok-Soo Oh<sup>1@</sup>**

**Raw Data Figures**

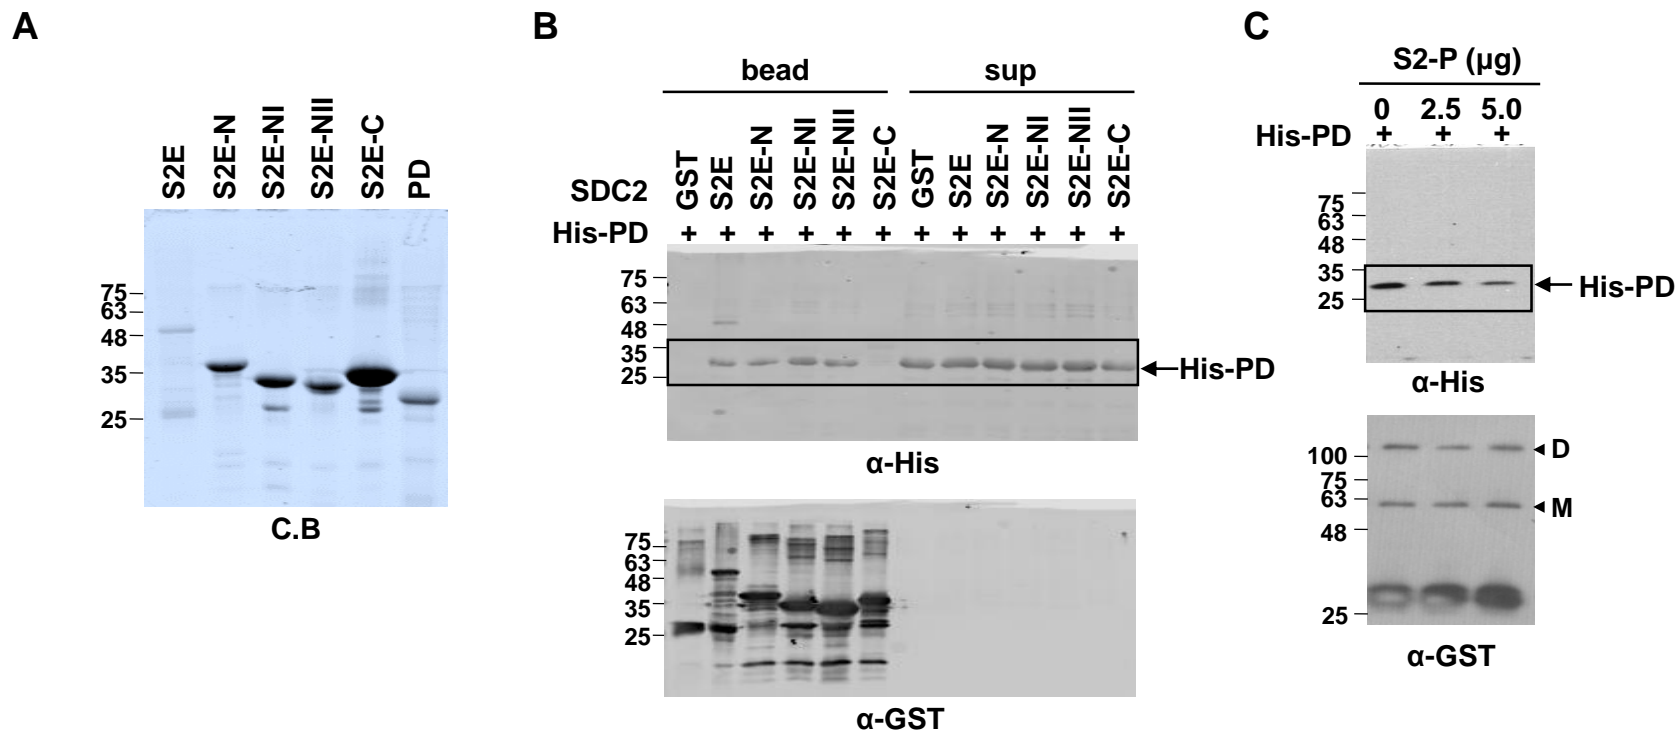

### Supplementary Figure 1 : Full-length blots presented in Figure 1.

Raw data of (A) coomassie blue (C.B) stained gel with purified GST-SDC2 mutants and the His-tagged pro-domain of MMP-7. (B,C) Full length western-blot of His- ( $\alpha$ -His) and GST-tag ( $\alpha$ -GST). (shown as cropped images in Figure 1 A, B and C).

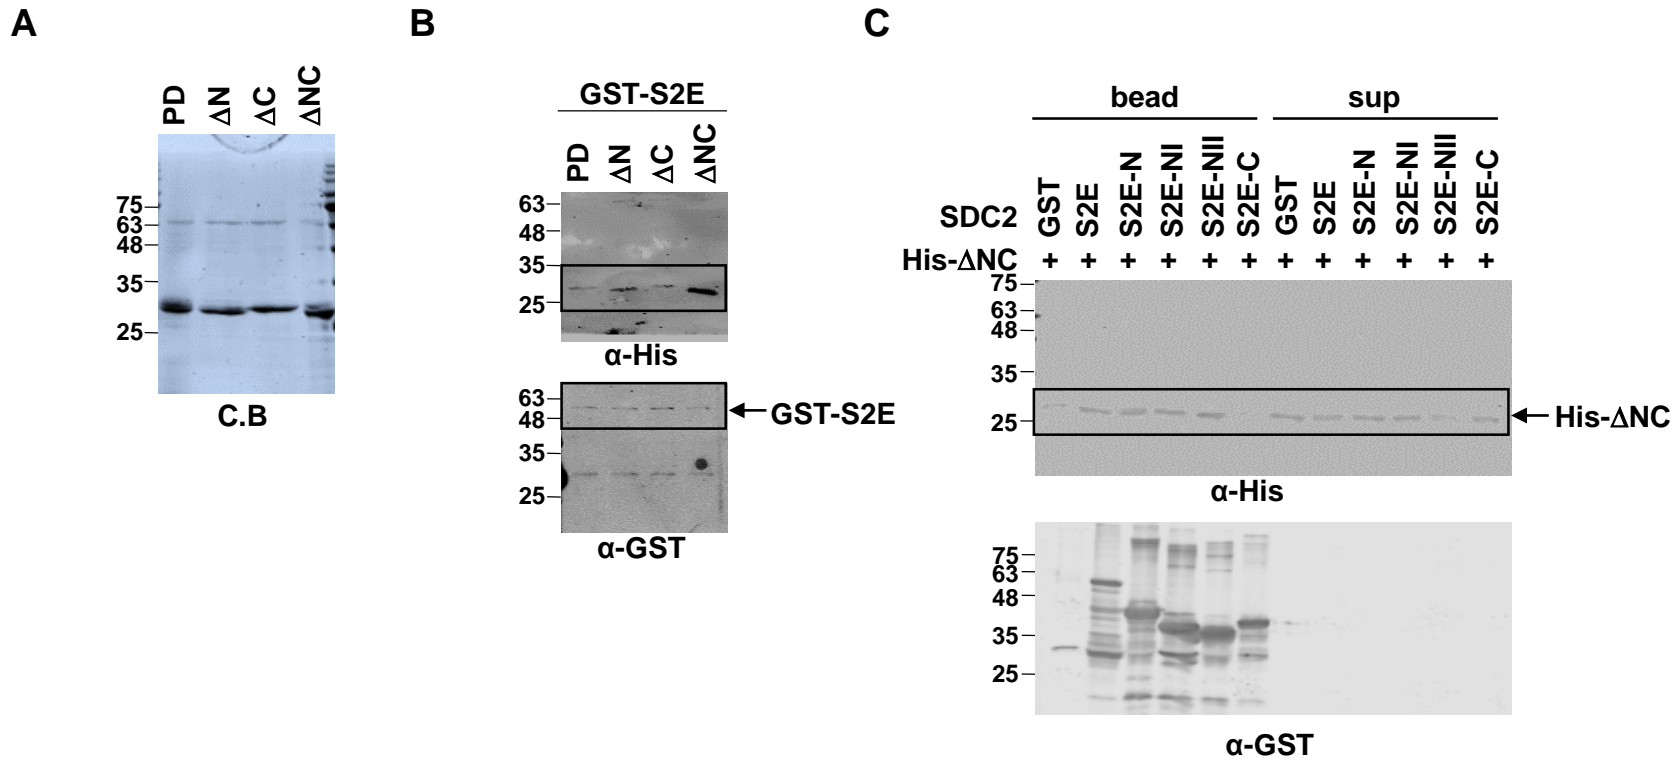

### Supplementary Figure 2 : Full-length blots presented in Figure 2.

Raw data of (A) coomassie blue (C.B) stained gel with purified His-tagged pro-domain of MMP-7 mutants. (B,C) Full length western-blots of His- ( $\alpha$ -His) and GST-tag ( $\alpha$ -GST). (shown as cropped images in Figure 2 A, B and D).

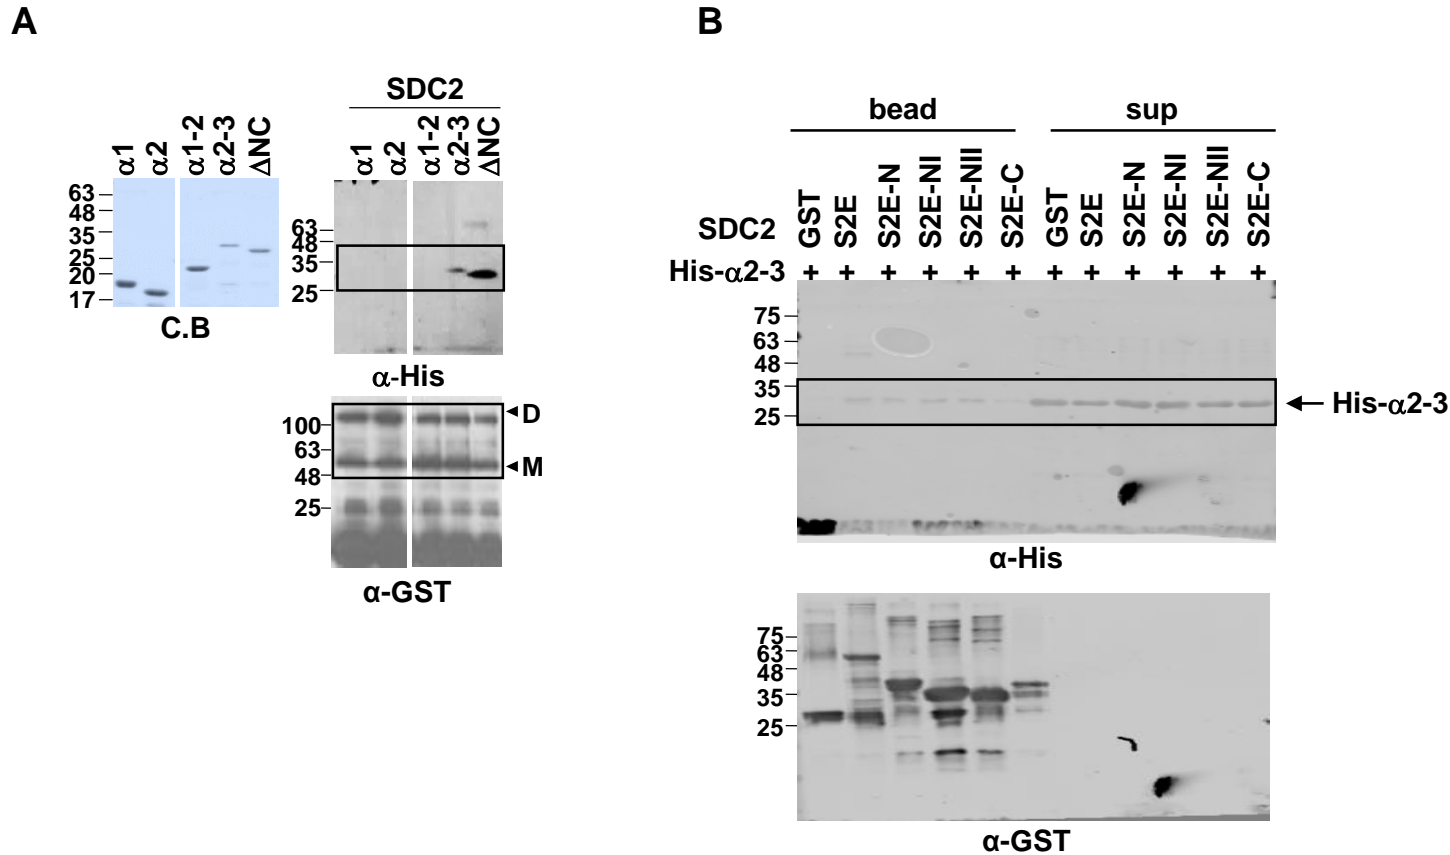

**Supplementary Figure 3 : Full-length blots presented in Figure 4.**

Raw data of (A) coomassie blue (C.B) stained gel with purified pro-domain of MMP-7 mutants (left panel). Full length of western-blots of His- ( $\alpha$ -His) and GST-tag ( $\alpha$ -GST, right panel). (B) Full length western-blots of His- ( $\alpha$ -His) and GST-tag ( $\alpha$ -GST). (shown as cropped images in Figure 4 A, B).

A

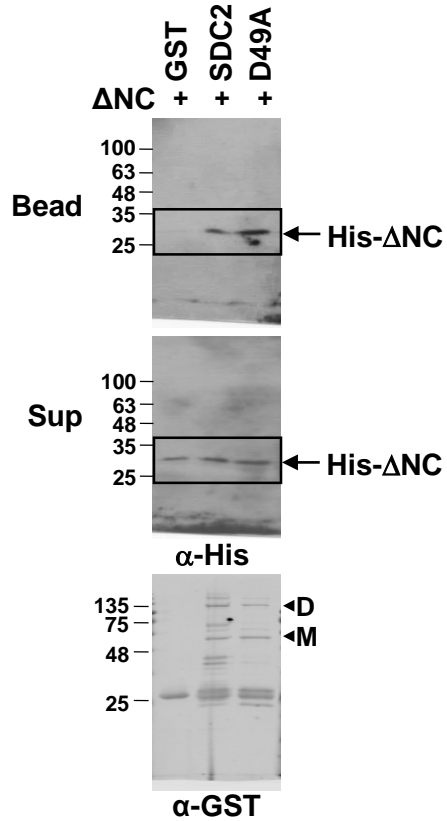

B

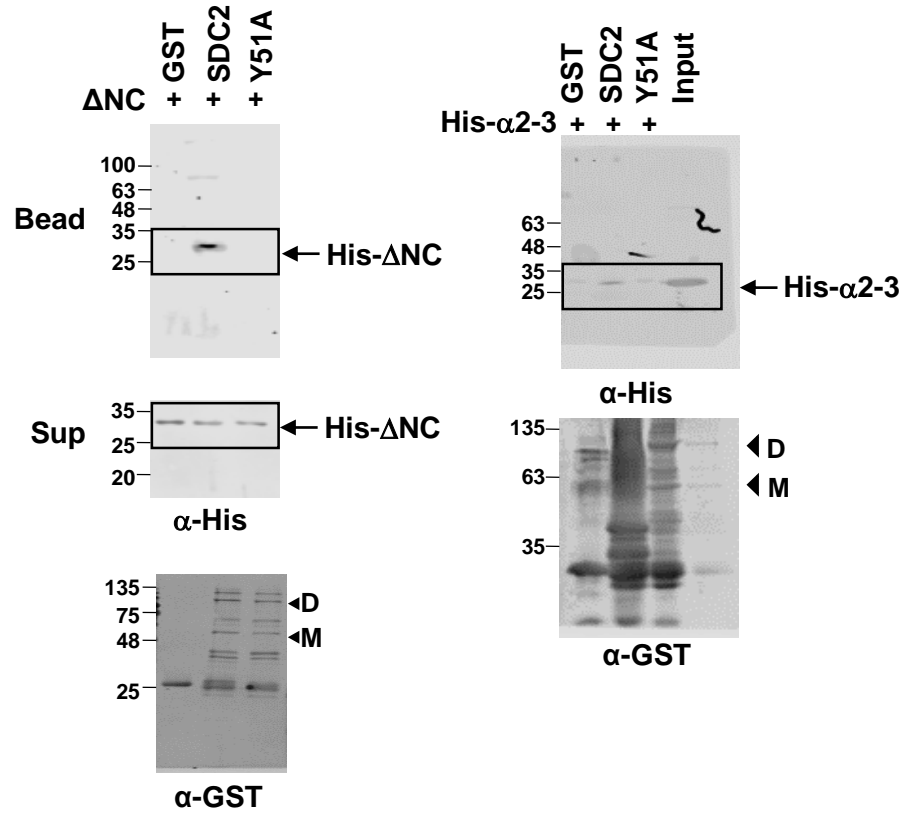

### Supplementary Figure 4 : Full-length blots presented in Figure 5.

(A,B) Raw data of full length western-blot of His- ( $\alpha$ -His) and GST-tag ( $\alpha$ -GST). (shown as cropped images in Figure 5 A, B).

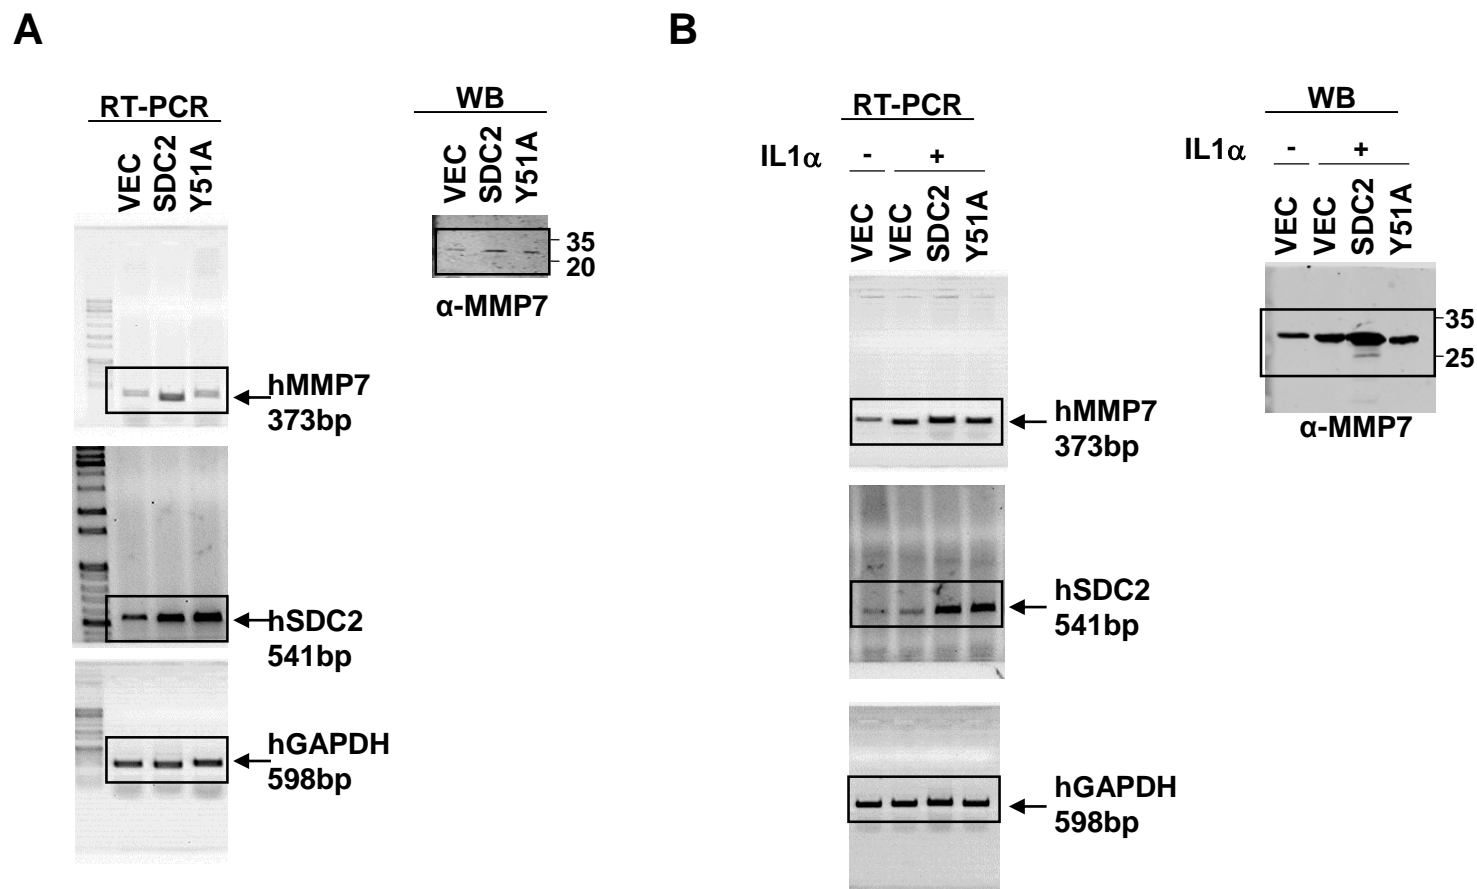

**Supplementary Figure 5 : Full-length blots and gels presented in Figure 6.**

(A, B) Raw data of full length of agarose gel used for analysis of PCR products (left panel) and full length western-blot of MMP-7 (right panel). (shown as cropped images in Figure 6 B, D).

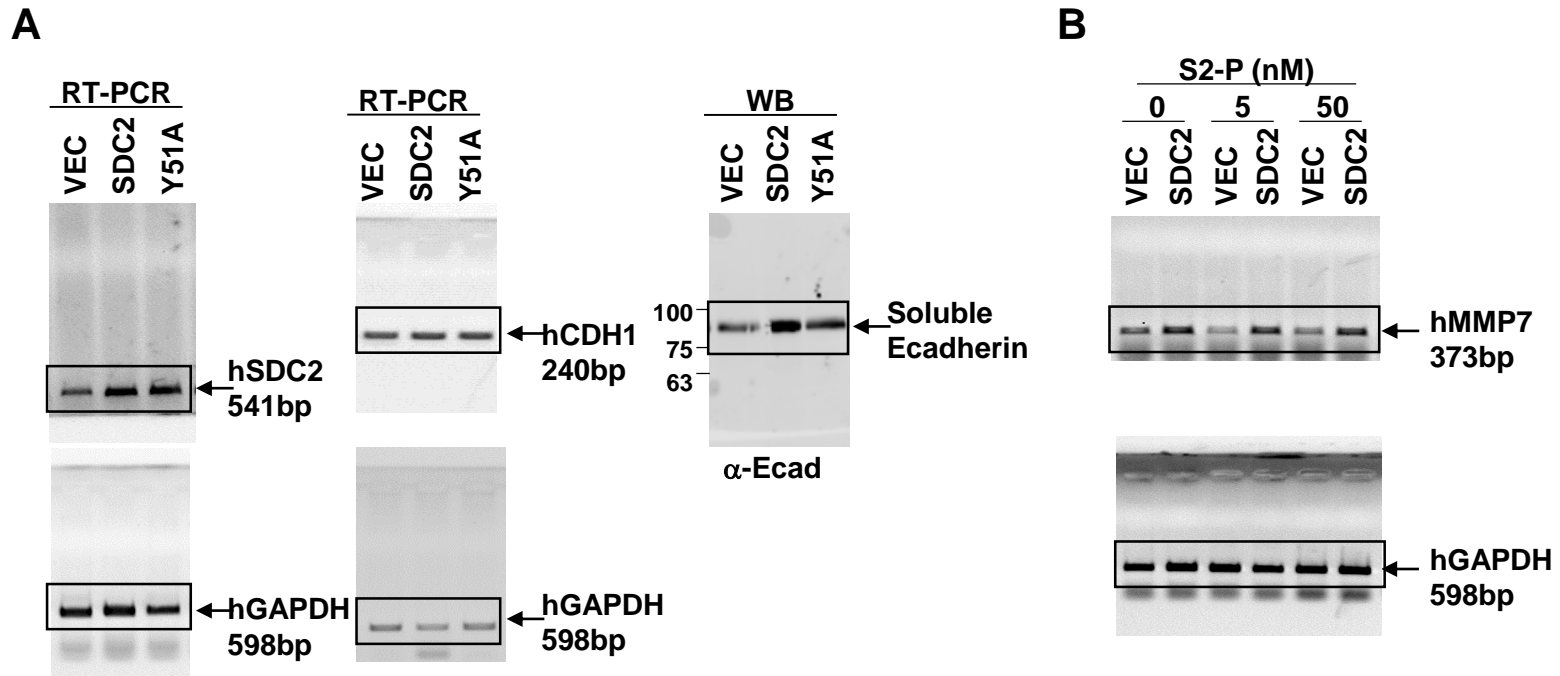

**Supplementary Figure 6 : Full-length blot and gels presented in Figure 7.**

Raw data of (A) Full length of agarose gel used for analysis of PCR products (left panel) and full length western-blot of E-cadherin (right panel). (B) Full length of agarose gel used for analysis of PCR products. (shown as cropped images in Figure 7 A, E).
